# Supplementary material for: Health and Wellness Projects Created by Student Pharmacists during Advanced Pharmacy Practice Experiences: Exploring the Impact on Professional Development
Source: MDPI journal article supplement (doi:10.3390/pharmacy12010005), 2023-12-28
Supplement: s1 [file s1]

Table S1. Health & Wellness Projects will be evaluated by Experiential Education using the following Rubric:

| Project elements       | 2= Exemplary                                                                                                                                                                                                                                                                                                                                                                                                                                                                                                                                                                                                                                                                                                        | 1= Acceptable                                                                                                                                                                                                                                                                                                                                                                                                                                                                                                                                                                                                                                                                                   | 0= Unacceptable                                                                                                                                                                                                                                                                                                                                                                                                                                                                                                                                     |
|------------------------|---------------------------------------------------------------------------------------------------------------------------------------------------------------------------------------------------------------------------------------------------------------------------------------------------------------------------------------------------------------------------------------------------------------------------------------------------------------------------------------------------------------------------------------------------------------------------------------------------------------------------------------------------------------------------------------------------------------------|-------------------------------------------------------------------------------------------------------------------------------------------------------------------------------------------------------------------------------------------------------------------------------------------------------------------------------------------------------------------------------------------------------------------------------------------------------------------------------------------------------------------------------------------------------------------------------------------------------------------------------------------------------------------------------------------------|-----------------------------------------------------------------------------------------------------------------------------------------------------------------------------------------------------------------------------------------------------------------------------------------------------------------------------------------------------------------------------------------------------------------------------------------------------------------------------------------------------------------------------------------------------|
| Description of project | <ul style="list-style-type: none"> <li>Project objectives are stated clearly, <b>and</b> in a way that demonstrates student understanding of the health and wellness needs 2.3, 2.4</li> <li>Project intervention addresses identification, prevention and/or management, for individuals or specific populations to improve health and wellness <b>2.3,2.4 3.3 and</b></li> <li>Project evaluates personal, social, economic <b>and</b> environmental conditions to maximize health and wellness 3.4 <b>and</b></li> <li>Project is a creative and/or unique way to address the health and wellness objective4.3</li> <li>Creates a long-term or ongoing project over the course of the entire rotation</li> </ul> | <ul style="list-style-type: none"> <li>Briefly lists objectives pertinent to the project</li> <li>Project addresses one or more of the following for individuals or specific populations to improve health and wellness: <ul style="list-style-type: none"> <li>management</li> <li>prevention</li> <li>intervention</li> </ul> </li> <li>Project evaluates one or more of the following: <ul style="list-style-type: none"> <li>personal</li> <li>social</li> <li>economic</li> <li>environmental</li> </ul> conditions to maximize health and wellness</li> <li>Scope of the project is appropriate</li> <li>In an already established program provides a unique perspective/input</li> </ul> | <ul style="list-style-type: none"> <li>Project does not address management <b>or</b> prevention <b>or</b> intervention <b>or</b> educational strategies for individuals or specific populations to improve health and wellness</li> <li>Project does not evaluate personal <b>or</b> social <b>or</b> economic <b>or</b> environmental conditions to maximize health and wellness.</li> <li>Does not list objective of the project</li> <li>Participates in an already established program with no student input (other than attendance)</li> </ul> |
| Materials              | <ul style="list-style-type: none"> <li>Creates original materials specific to the project 4.3</li> <li>Provides a wide variety of materials, in more than one format</li> <li>Language and information is tailored for intended population3.5.3, 3.2, 3.6 at appropriate literacy level, language.</li> </ul>                                                                                                                                                                                                                                                                                                                                                                                                       | <ul style="list-style-type: none"> <li>Provides informational materials</li> <li>Uses pre-printed, non-original materials</li> <li>Minimal spelling and grammar mistakes</li> <li>Language is clear and patient appropriate</li> </ul>                                                                                                                                                                                                                                                                                                                                                                                                                                                          | <ul style="list-style-type: none"> <li>No materials uploaded or described</li> <li>Many spelling and grammar mistakes</li> <li>Unprofessional language is used often (texting language)</li> </ul>                                                                                                                                                                                                                                                                                                                                                  |

|                          |                                                                                                                                                                                                                                                                                                                                                                                          |                                                                                                                                                                                                                                                                                                                                                                                          |                                                                                                                                                                                                                                                                                                 |
|--------------------------|------------------------------------------------------------------------------------------------------------------------------------------------------------------------------------------------------------------------------------------------------------------------------------------------------------------------------------------------------------------------------------------|------------------------------------------------------------------------------------------------------------------------------------------------------------------------------------------------------------------------------------------------------------------------------------------------------------------------------------------------------------------------------------------|-------------------------------------------------------------------------------------------------------------------------------------------------------------------------------------------------------------------------------------------------------------------------------------------------|
|                          | <ul style="list-style-type: none"> <li>Materials are professional-looking, neat, visually appealing. Patient friendly language used. Information is accurate. 2.1</li> <li>References are cited and/or provided</li> </ul>                                                                                                                                                               | <ul style="list-style-type: none"> <li>References cited/provided</li> </ul>                                                                                                                                                                                                                                                                                                              | <ul style="list-style-type: none"> <li>Language is not patient friendly</li> <li>References not cited</li> </ul>                                                                                                                                                                                |
| Addressing the Standards | <ul style="list-style-type: none"> <li>Addresses 3 or more standards 3.3, 2.1, 3.2, 3.5.3, 2.3, 2.4, 3.5</li> <li>Provides specifics for each standard cited <b>and</b></li> <li>States how this will address management, prevention <b>and</b> intervention of the specific population <b>and</b></li> <li>Defines what outcomes are to be expected</li> </ul>                          | <ul style="list-style-type: none"> <li>Addresses &lt;3 standards <b>OR</b></li> <li>Provides non-specific or generic examples <b>OR</b></li> <li>Project addresses one or more of the following: <ul style="list-style-type: none"> <li>management,</li> <li>prevention</li> <li>intervention <b>OR</b></li> </ul> </li> <li>Does not define what outcomes are to be expected</li> </ul> | <ul style="list-style-type: none"> <li>Addresses &lt; 2 standards <b>and</b></li> <li>Provides non-specific or generic definition of the standard <b>and</b></li> <li>Does not address management, prevention or intervention <b>and</b></li> <li>Does not provide expected outcomes</li> </ul> |
| Post project summary     | <ul style="list-style-type: none"> <li>Project outcomes are described in detail</li> <li>Description of the factors contributing to the outcomes of the program show student reflection on the planning and implementation of the program 3.1</li> <li>Detailed information pertaining to the attendance and number of interventions conducted is included (specific numbers)</li> </ul> | <ul style="list-style-type: none"> <li>Project outcomes and factors contributing to the outcomes are clearly stated</li> <li>Brief/generic information is given pertaining to the attendance/number of interventions conducted</li> </ul>                                                                                                                                                | <ul style="list-style-type: none"> <li>Post-project summary is missing</li> <li>Summary is too brief and generic to understand the outcomes</li> </ul>                                                                                                                                          |
| Essay                    | <ul style="list-style-type: none"> <li>Shows expanded thought processes in describing a pharmacist's role in health and wellness 4.1, 4.3, 4.4</li> <li>Exhibits self-awareness in relating health and wellness to future career goals/plans 4.1</li> </ul>                                                                                                                              | <ul style="list-style-type: none"> <li>Adequately describes a pharmacist's role in health and wellness</li> <li>Explains how this role will impact the student's future career</li> </ul>                                                                                                                                                                                                | <ul style="list-style-type: none"> <li>Does not accurately describe a pharmacist's role in health and wellness</li> <li>Does not link to student's future career</li> </ul>                                                                                                                     |

**Exemplary project = 4 out of 5 exemplary scored project elements**

**Unacceptable = an unacceptable score in a project element requires revision of that element**
